# Supplementary material for: Role of the Mechanisms of Detection in the Increased Risk of Thyroid Cancer: A Retrospective Cohort Study in an HMO in Buenos Aires
Source: Hindawi journal article supplement (doi:10.1155/2018/8986074), 2018-07-15
Supplement: f1 [file 8986074.f1.pdf]

Supplementary Table 1 Types and subtypes of mechanisms of detection of thyroid cancer in PSHI 2003-2012

| MECHANISM OF DETECTION             | N   | %    |
|------------------------------------|-----|------|
| Clinical evaluation                |     |      |
| Clinically evident thyroid mass    | 26  | 25.7 |
| Neck lymphadenopathy               | 1   | 0.9  |
| Preexistent benign thyroid disease | 72  | 71.3 |
| Screening in high risk groups      | 2   | 1.9  |
| Total                              | 101 | 100  |
| Incidental detection               |     |      |
| Imaging studies                    | 36  | 82   |
| Thyroid ultrasound                 | 12  |      |
| Neck ultrasound                    | 7   |      |
| Carotid Artery Doppler             | 7   |      |
| CAT Scan o MRI                     | 10  |      |
| Other                              | 2   |      |
| Surgery                            | 8   | 18   |
| Total                              | 44  | 100  |
| Self detection                     |     |      |
| Visible or palpable mass           | 24  | 77   |
| Compression symptoms               | 7   | 23   |
| Total                              | 31  | 100  |
